# Supplementary material for: Facile synthesis of thiol-functionalized amphiphilic polylactide–methacrylic diblock copolymers
Source: Royal Society of Chemistry journal article supplement (doi:10.1039/c3py01446k), 2013-11-27
Supplement: c3py01446k.pdf [file c3py01446k.pdf]

Supporting Information for *Polymer Chemistry* manuscript:

Facile Synthesis of Thiol-Functionalized

Amphiphilic Polylactide-Methacrylic Diblock Copolymers

Efrosyni Themistou,<sup>\*a,b</sup> Giuseppe Battaglia<sup>b,c</sup> and Steven P. Armes<sup>\*a</sup>

<sup>a</sup> Department of Chemistry, University of Sheffield, Brook Hill, Sheffield, South Yorkshire, S3 7HF, UK.

<sup>b</sup> Department of Biomedical Science, University of Sheffield, Sheffield, South Yorkshire, S10 2TN, UK.

<sup>c</sup> Department of Chemistry, University College London, London, WC1H 0AJ, UK.

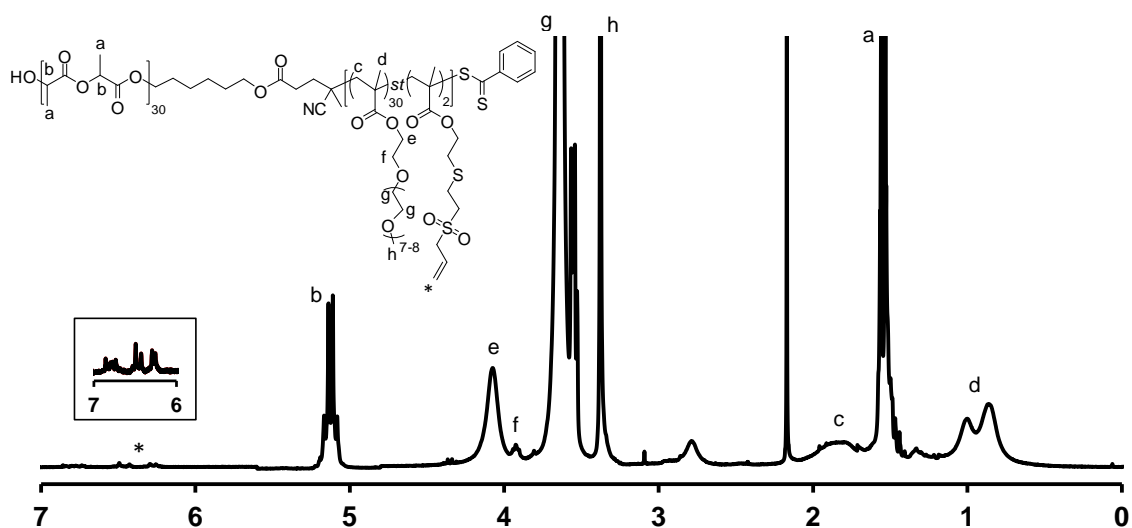

**Figure S1.** <sup>1</sup>H NMR spectrum (CDCl<sub>3</sub>) recorded for a PLA<sub>30</sub>-P(OEGMA<sub>30</sub>-*stat*-VSTEMA<sub>2</sub>) linear diblock copolymer after functionalization with divinyl sulfone.

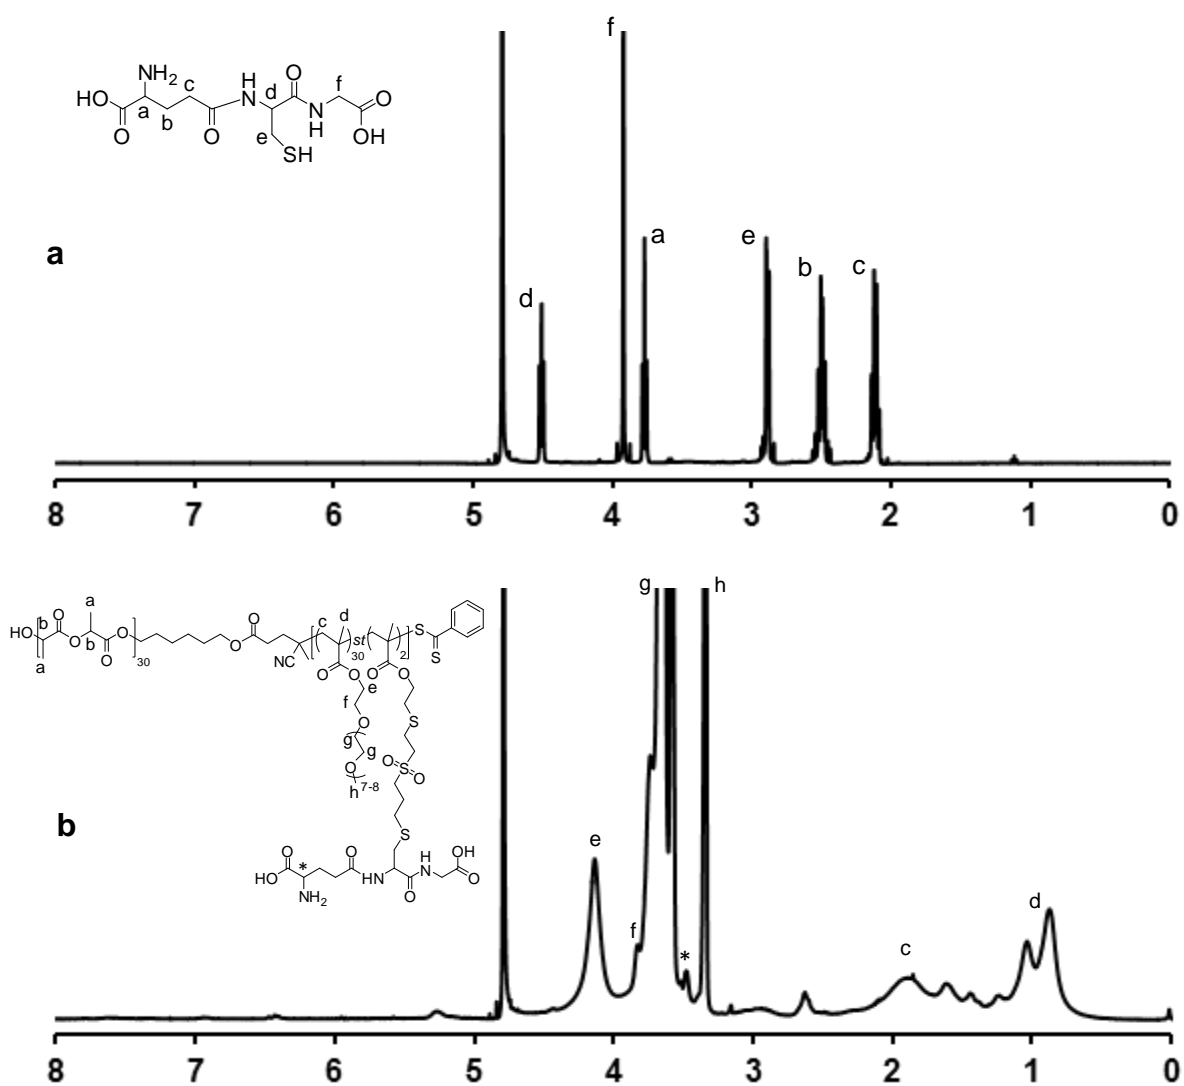

**Figure S2.**  $^1\text{H}$  NMR ( $\text{D}_2\text{O}$ ) spectra of (a) *L*-glutathione in  $\text{D}_2\text{O}$  and (b)  $\text{PLA}_{30}\text{-P}(\text{OEGMA}_{30}\text{-stat-GluVSTEMA}_2)$  diblock copolymer.

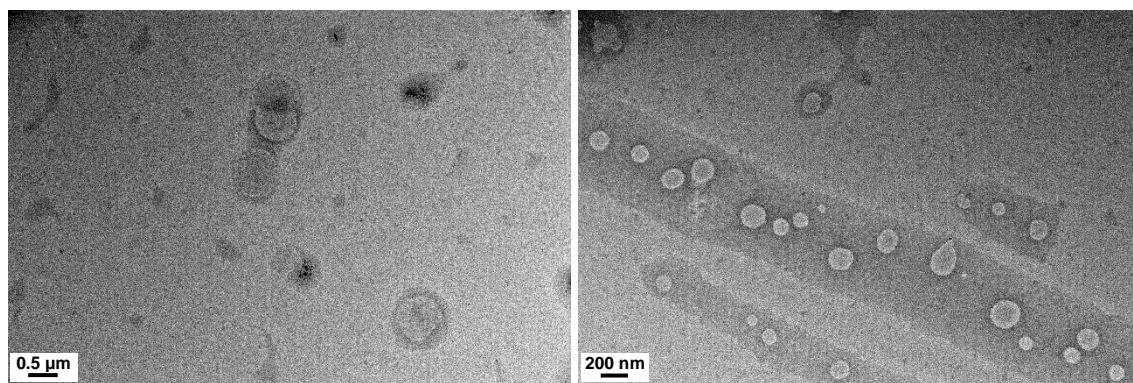

**Figure S3.** TEM images obtained for the  $\text{PLA}_{27}\text{-PGMA}_{29}$  diblock copolymer particles prepared by two-step ROP-RAFT polymerization in 1,2-dichloroethane. No staining was used for this sample.

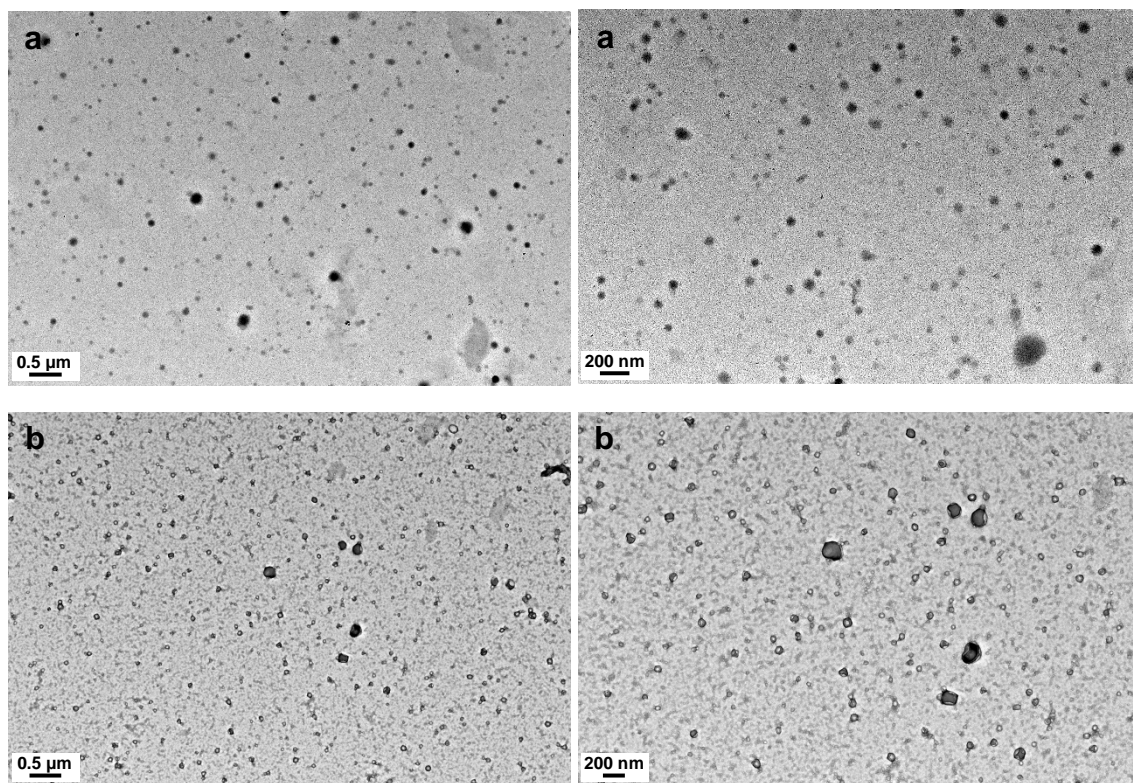

**Figure S4.** TEM images obtained after an acetone-to-water solvent switch for indium-conjugated  $\text{PLA}_{30}\text{-P}(\text{DMA}_{30}\text{-stat-InDOTATEMA}_2)$  diblock copolymer particles prepared by simultaneous ROP-RAFT polymerization: (a) no stain and (b) uranyl formate was used as a staining agent.
